# Supplementary material for: Rapid fluorescence detection of hypoxic microenvironments by nitro-benzyl conjugated chitosan nanoparticles encapsulating hydrophobic fluorophores
Source: Royal Society of Chemistry journal article supplement (doi:10.1039/c6tb00935b), 2016-01-01
Supplement: c6tb00935b1.pdf [file c6tb00935b1.pdf]

# Rapid fluorescence detection of hypoxic microenvironment by nitro-benzyl conjugated chitosan nanoparticles encapsulating hydrophobic fluorophores

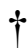

*Long Ren,<sup>a</sup> Young Joon Kim,<sup>b</sup> Song Yi Park,<sup>b</sup> Sein Lee,<sup>b</sup> Joo-Yong Lee,<sup>b</sup> Chan Pil*

*Park<sup>\*,b</sup> and Yong Taik Lim<sup>\*,a</sup>*

<sup>a</sup>. SKKU Advanced Institute of Nanotechnology (SAINT), School of Chemical Engineering, Sungkyunkwan University, Suwon 16419, Republic of Korea.

<sup>b</sup>. Graduate School of Analytical Science and Technology, Chungnam National University, Daejeon, Republic of Korea.

\* Corresponding Author Tel.: +82 31 2994172

E-mail addresses: yongtaik@skku.edu, [chan@cnu.ac.kr](mailto:chan@cnu.ac.kr)

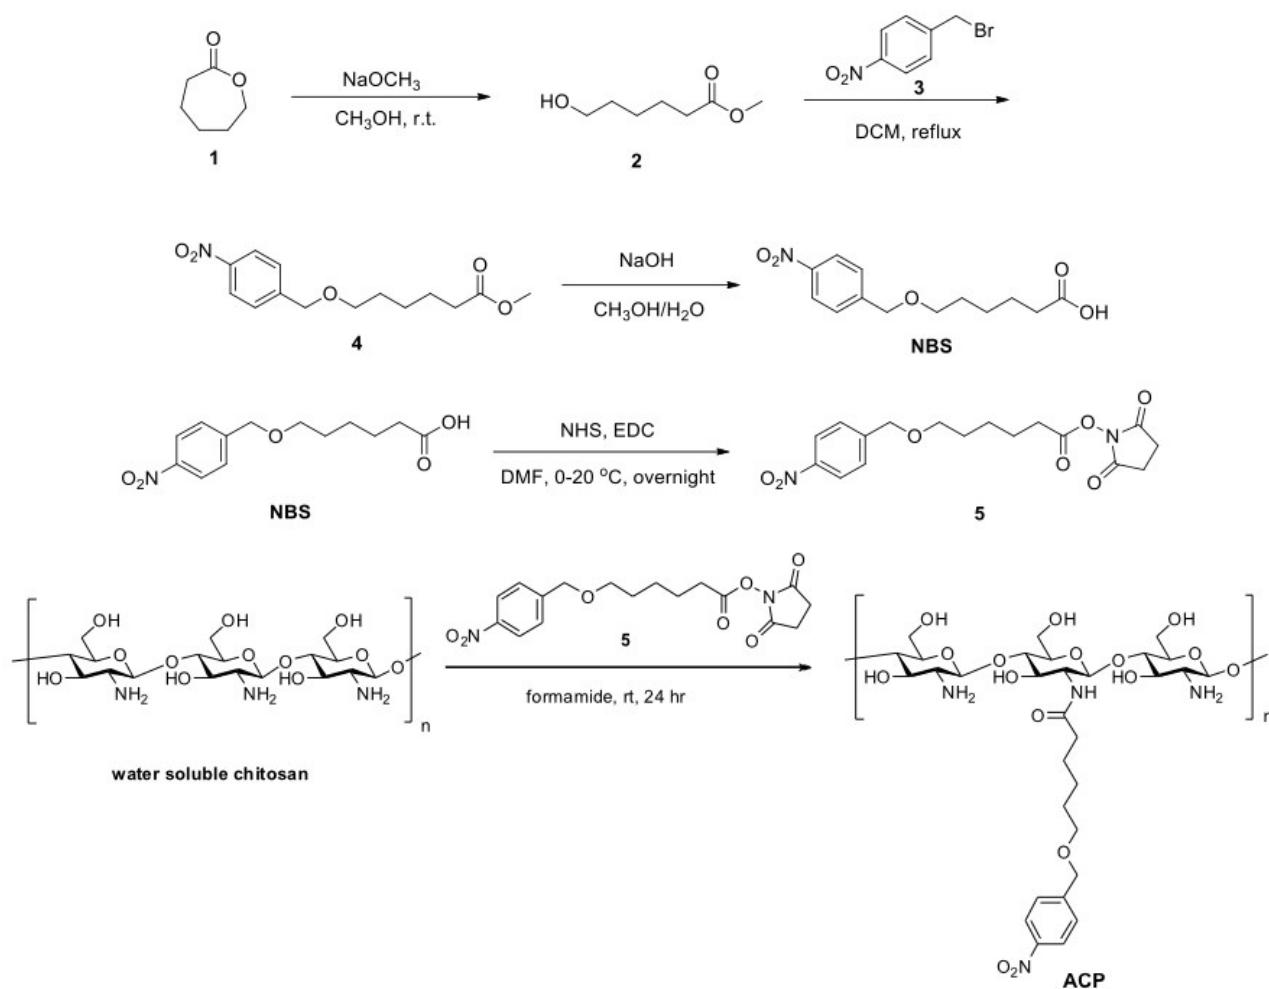

Scheme S1 Synthetic route of amphiphilic chitosan polymer (ACP).

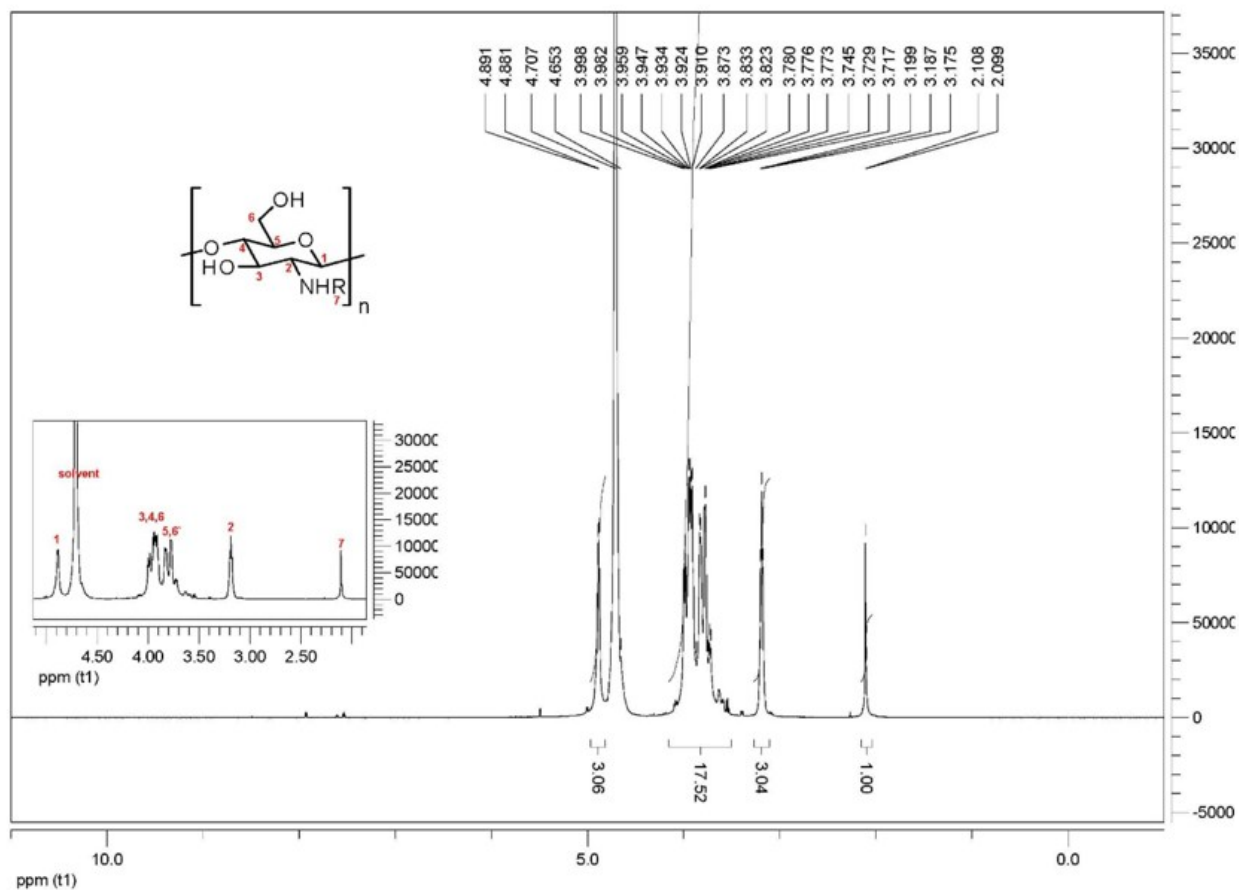

Fig. S1  $^1\text{H}$  NMR spectrum of water-soluble chitosan in  $\text{D}_2\text{O}$ .

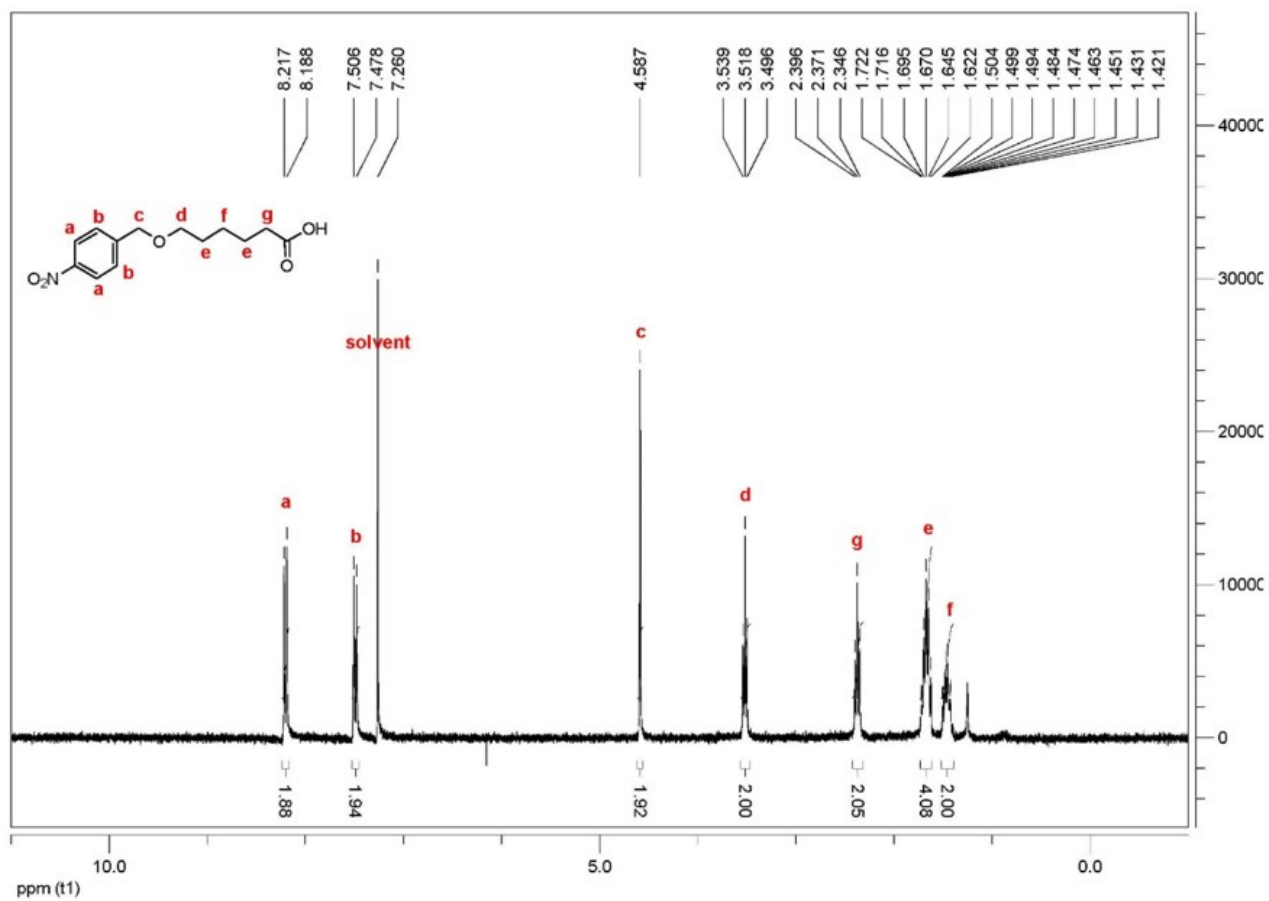

Fig. S2  $^1\text{H}$  NMR spectrum of nitro-benzyl substrate (NBS) in  $\text{CDCl}_3$ .

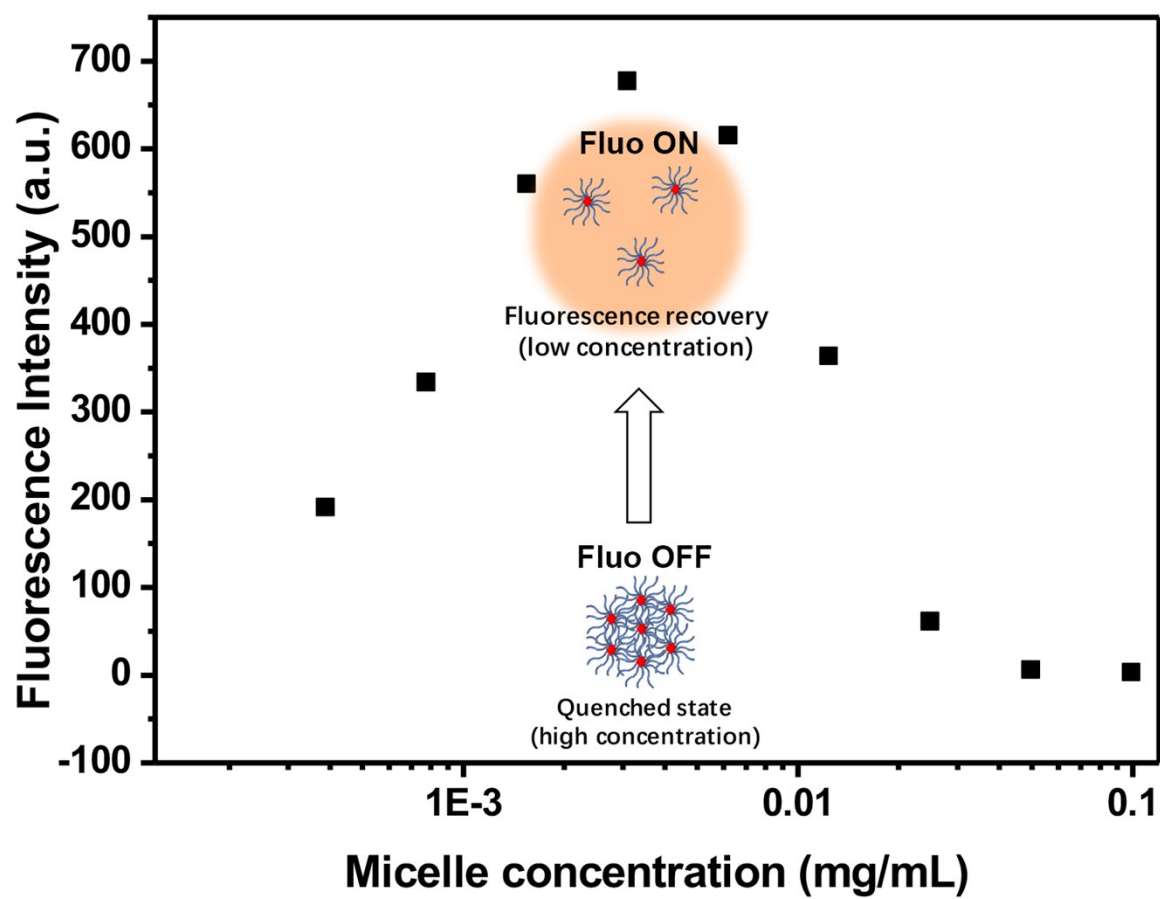

Fig. S3 Fluorescence intensity of HRCN-R6G with micelle concentration

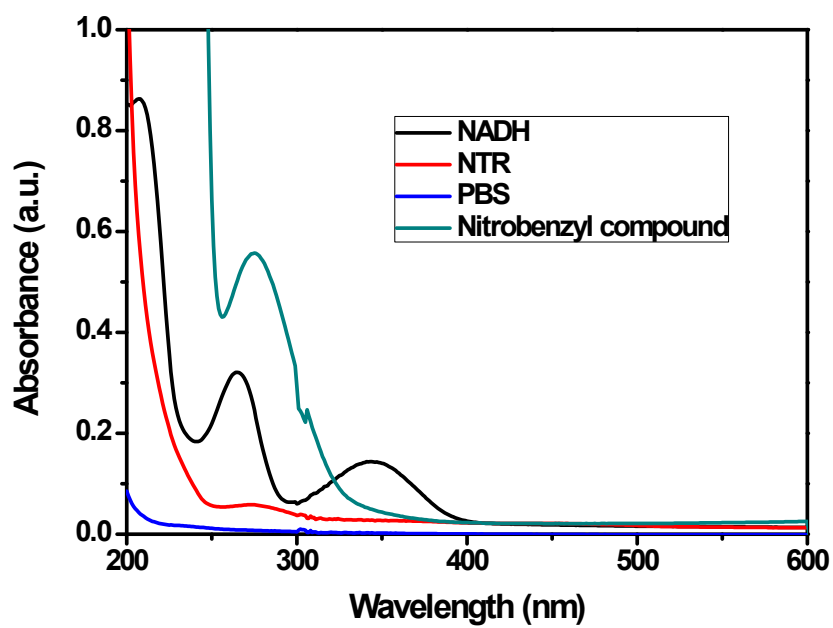

Fig.S4 UV absorption spectra of PBS, NADH, NTR, and nitrobenzyl compound.

**A**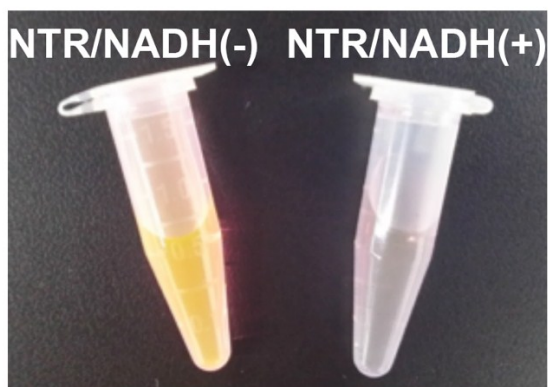**B**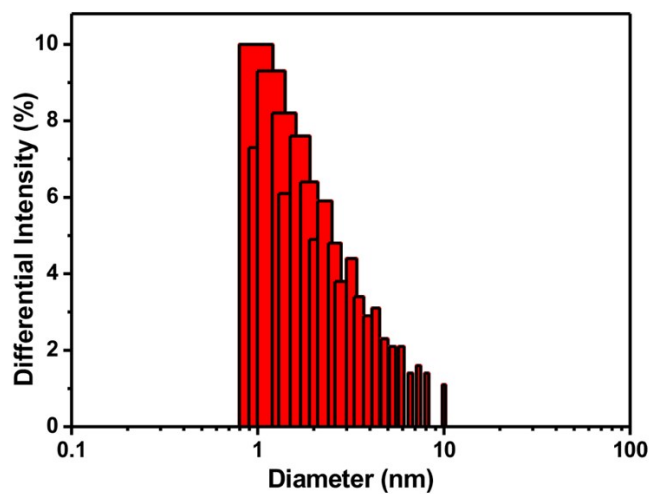

Fig. S5 (A) Photographs of HRCN-R6G without (left) and with (right) NTR/NADH. (B) Size distribution of HRCN-R6G after treating with NTR/NADH.

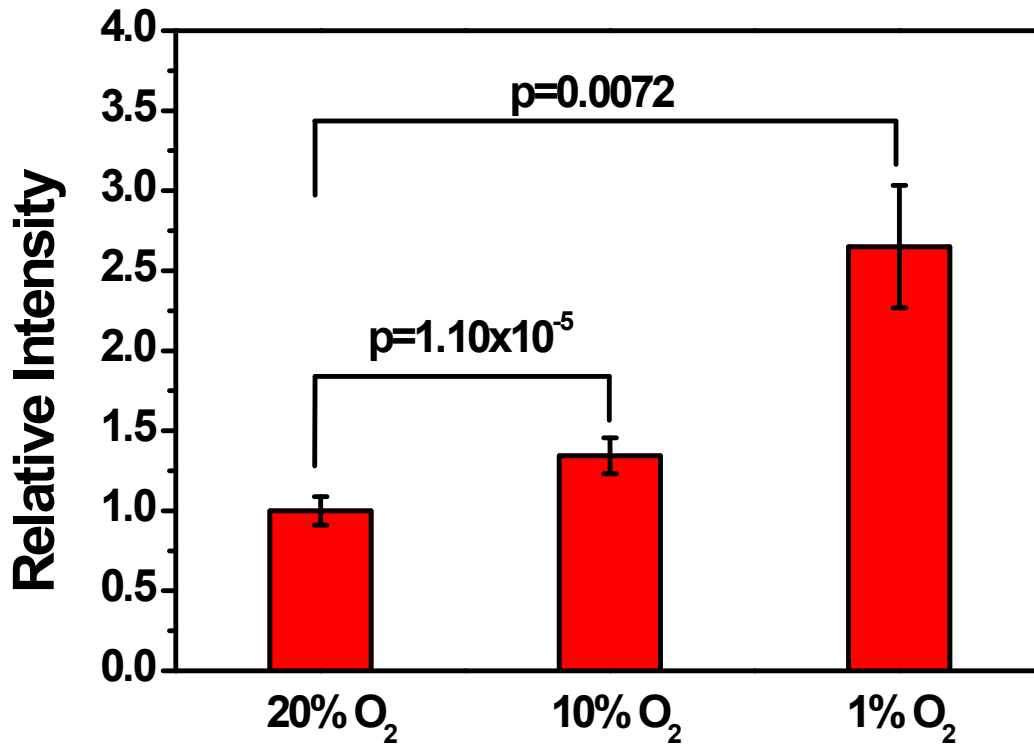

Fig. S6 Mean FI after incubation under normoxia and hypoxia (10% O<sub>2</sub> and 1% O<sub>2</sub>) condition for 30 mins. T tests were used to determine the significance between normoxia & hypoxia groups.
